# Supplementary material for: Real-word study of racial/ethnic disparities and socioeconomic determinants of overall survival in male breast cancer
Source: Research Square preprint supplement (doi:10.21203/rs.3.rs-5808248/v1), 2025-02-21
Supplement: Supplementary file 1 [file 7c81d9cd20e7a34f24e58170.pdf]

## **Supplemental Materials**

**Supplementary Figure 1.** CONSORT Diagram of Cohort Selection of Male Patients with Breast Cancer in the National Cancer Database

**Supplementary Figure 2.** Kaplan-Meier Curves for Overall Survival of Male Patients with Breast Cancer, Overall

**Supplementary Table 1.** Number of Events and Estimated Median Survival Time among Male Patients with Breast Cancer, Overall and Stratified by Tumor Stage and Molecular Subtype

**Supplementary Table 2.** Estimated 3-Year, 5-Year, and 10-Year Overall Survival Rates for Male Breast Cancer, Overall and Stratified by Tumor Stage and Molecular Subtype

**Supplementary Table 3.** Racial/Ethnic Differences in Overall Survival of Male Patients with Breast Cancer: Cox Proportional Hazards Regression

**Supplementary Table 4.** Cox Proportional Hazards Regression: Racial/Ethnic Differences in Overall Survival of Male Patients with Stage I Breast Cancer

**Supplementary Table 5.** Cox Proportional Hazards Regression: Racial/Ethnic Differences in Overall Survival of Male Patients with Stage II Breast Cancer

**Supplementary Table 6.** Cox Proportional Hazards Regression: Racial/Ethnic Differences in Overall Survival of Male Patients with Stage III Breast Cancer

**Supplementary Table 7.** Cox Proportional Hazards Regression: Racial/Ethnic Differences in Overall Survival of Male Patients with Stage IV Breast Cancer

**Supplementary Table 8.** Cox Proportional Hazards Regression: Racial/Ethnic Differences in Overall Survival of Male Patients with HR-Positive/HER2-Negative Breast Cancer

**Supplementary Table 9.** Cox Proportional Hazards Regression: Racial/Ethnic Differences in Overall Survival of Male Patients with HER2-Positive Breast Cancer

**Supplementary Table 10.** Cox Proportional Hazards Regression: Racial/Ethnic Differences in Overall Survival of Male Patients with Triple-Negative Breast Cancer

**Supplementary Figure 1.** CONSORT Diagram of Cohort Selection of Male Patients with Breast Cancer in the National Cancer Database

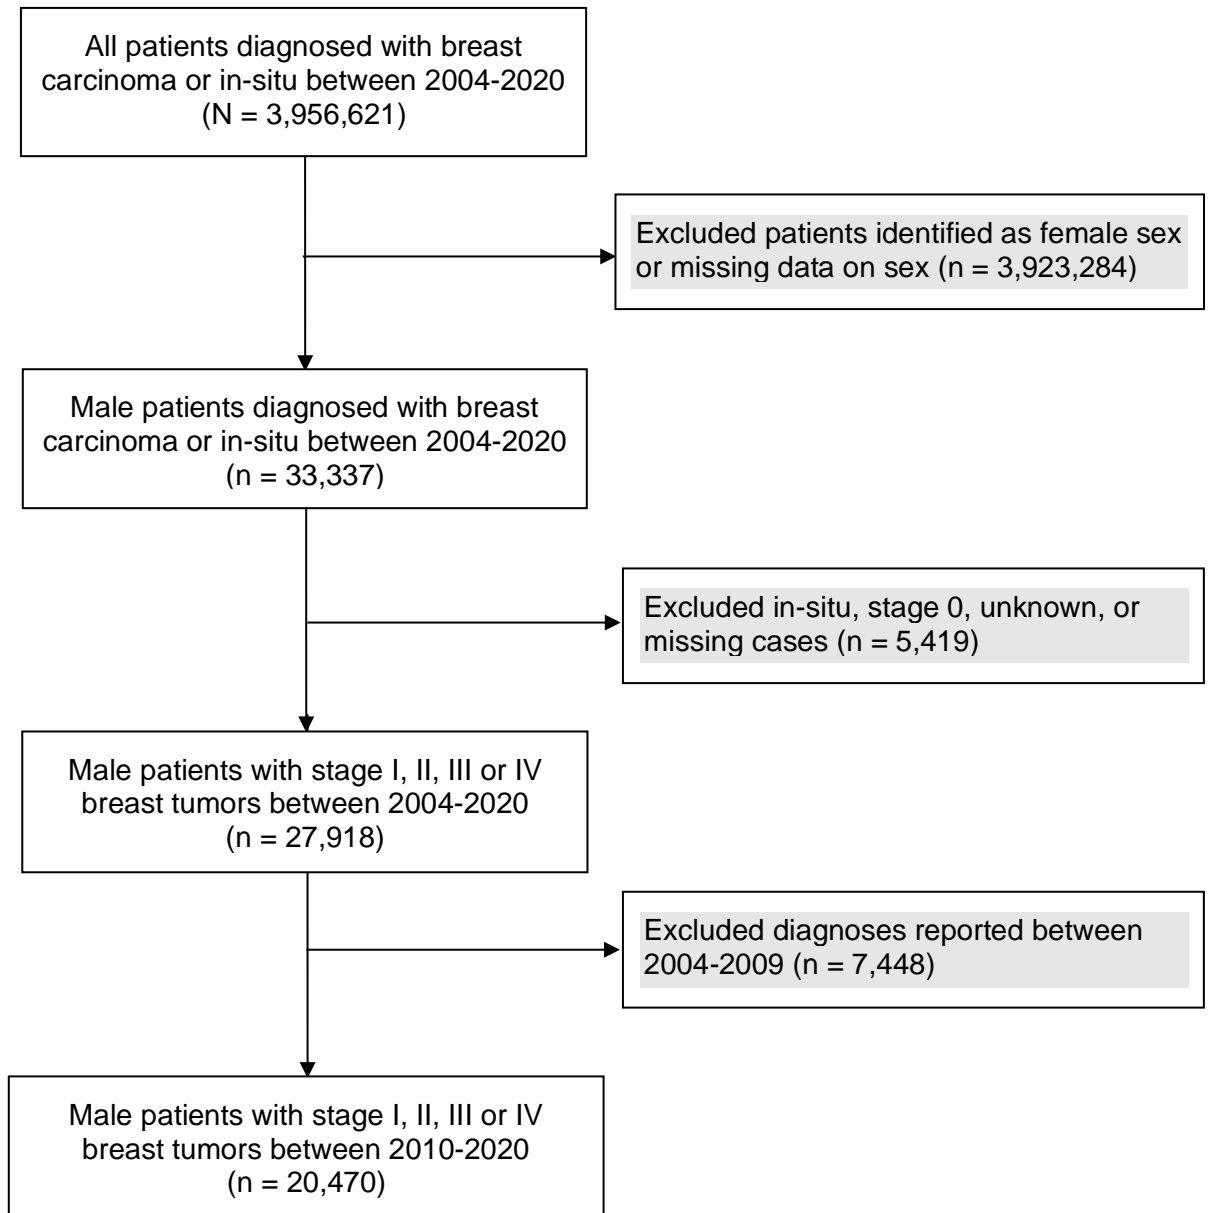

**Supplementary Figure 2.** Kaplan-Meier Curves for Overall Survival of Male Patients with Breast Cancer, Overall

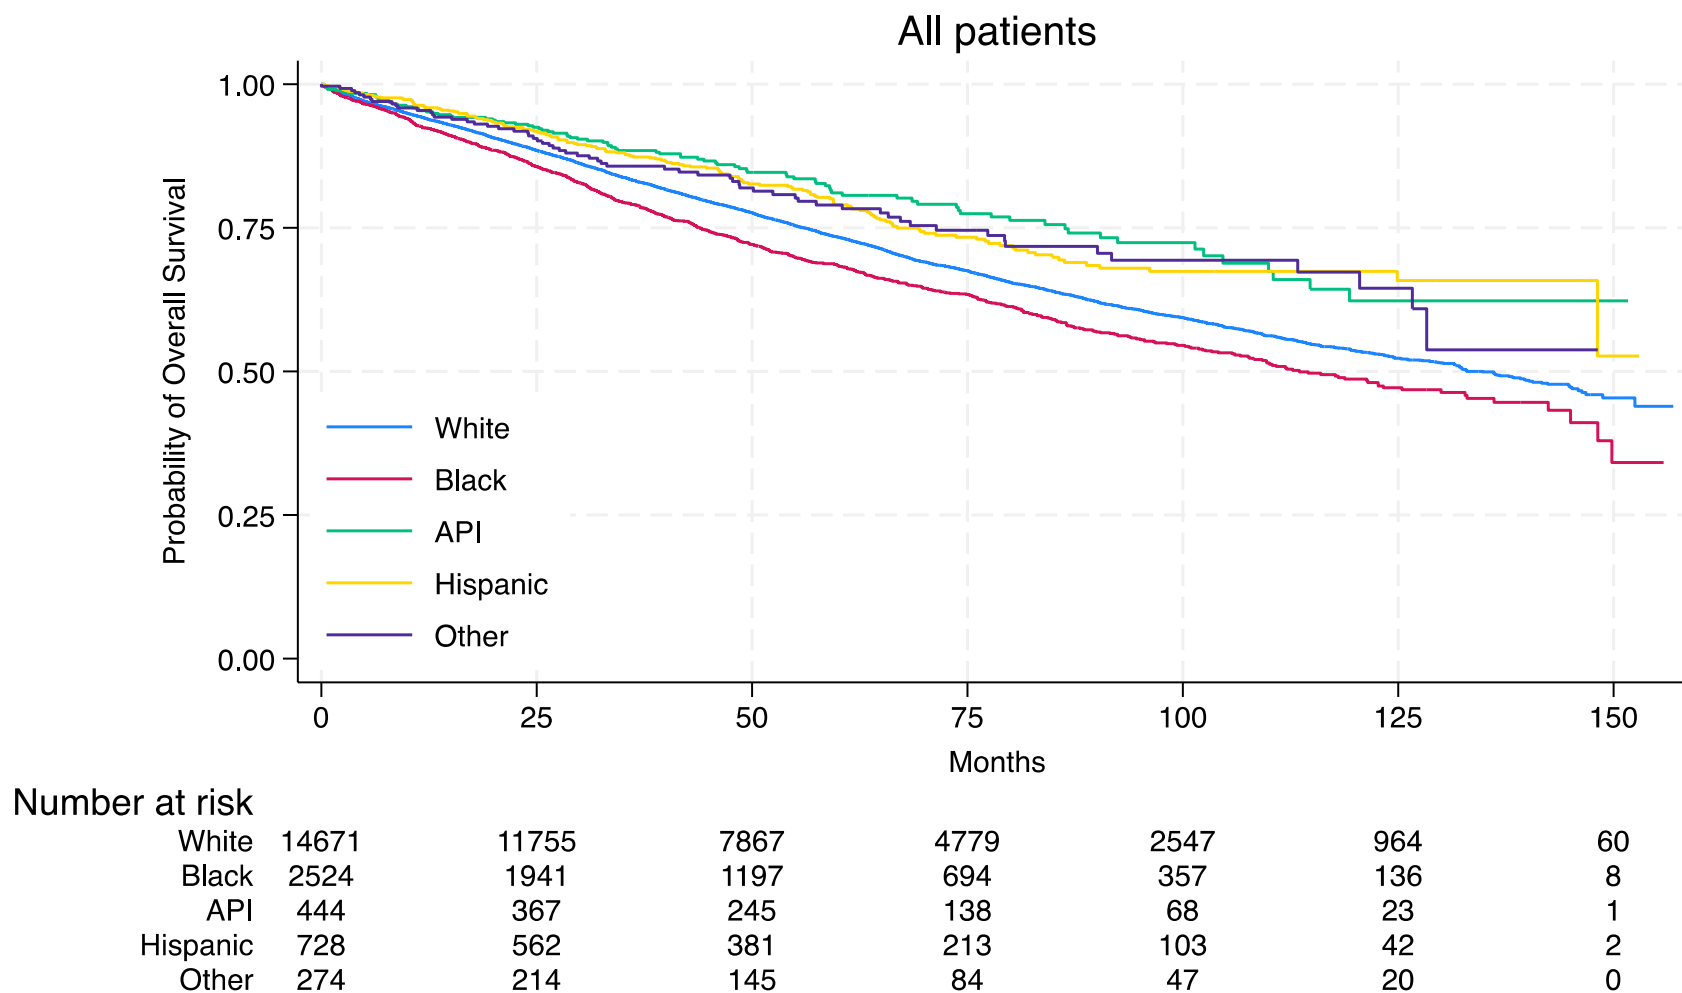

Abbreviations: API, Asian or Pacific Islander; HR, hormone receptor; HER2, human epidermal growth factor receptor 2; TNBC, triple-negative breast cancer.

**Supplementary Table 1.** Number of Events and Estimated Median Survival Time among Male Patients with Breast Cancer, Overall and Stratified by Tumor Stage and Molecular Subtype

|                    |                  | <b>Race/Ethnicity</b> | <b>No. of subjects</b> | <b>No. of events</b> | <b>Median survival time in months (95% CI)</b> | <b>P value <sup>a</sup></b> |
|--------------------|------------------|-----------------------|------------------------|----------------------|------------------------------------------------|-----------------------------|
| <b>Overall</b>     |                  | White                 | 14671                  | 4526                 | 134.77 (131.48, 140.22)                        | <0.001                      |
|                    |                  | Black                 | 2524                   | 860                  | 113 (106.68, 129.97)                           |                             |
|                    |                  | API                   | 444                    | 89                   | NR                                             |                             |
|                    |                  | Hispanic              | 728                    | 156                  | NR                                             |                             |
|                    |                  | Other                 | 274                    | 63                   | NR                                             |                             |
| <b>Tumor stage</b> | <b>Stage I</b>   |                       |                        |                      |                                                |                             |
|                    |                  | White                 | 6711                   | 1283                 | NR                                             | 0.002                       |
|                    |                  | Black                 | 918                    | 169                  | 145.02 (132.99, 149.82)                        |                             |
|                    |                  | API                   | 208                    | 19                   | NR                                             |                             |
|                    |                  | Hispanic              | 309                    | 37                   | NR                                             |                             |
|                    |                  | Other                 | 114                    | 16                   | NR                                             |                             |
|                    | <b>Stage II</b>  |                       |                        |                      |                                                |                             |
|                    |                  | White                 | 4902                   | 1634                 | 132.83 (127.80, 140.62)                        | <0.001                      |
|                    |                  | Black                 | 878                    | 285                  | 129.97 (112.07, -)                             |                             |
|                    |                  | API                   | 141                    | 30                   | NR                                             |                             |
|                    |                  | Hispanic              | 244                    | 49                   | 148.14 (148.14, -)                             |                             |
|                    |                  | Other                 | 100                    | 22                   | NR                                             |                             |
|                    | <b>Stage III</b> |                       |                        |                      |                                                |                             |
|                    |                  | White                 | 1911                   | 801                  | 92.65 (84.34, 105.00)                          | 0.012                       |
|                    |                  | Black                 | 418                    | 193                  | 82.23 (62.06, 103.39)                          |                             |
|                    |                  | API                   | 54                     | 15                   | NR                                             |                             |
|                    |                  | Hispanic              | 110                    | 34                   | NR                                             |                             |
|                    |                  | Other                 | 32                     | 11                   | NR                                             |                             |
|                    | <b>Stage IV</b>  |                       |                        |                      |                                                |                             |
|                    |                  | White                 | 1147                   | 808                  | 29.37 (27.01, 31.70)                           | 0.119                       |
|                    |                  | Black                 | 310                    | 213                  | 28.52 (22.57, 34.50)                           |                             |
|                    |                  | API                   | 41                     | 25                   | 33.28 (22.54, 59.24)                           |                             |

|                          |                  |          |       |      |                         |        |
|--------------------------|------------------|----------|-------|------|-------------------------|--------|
|                          |                  | Hispanic | 65    | 36   | 42.84 (25.10, 57.53)    |        |
|                          |                  | ther     | 28    | 14   | 48.49 (20.6, -)         |        |
| <b>Molecular subtype</b> |                  |          |       |      |                         |        |
|                          | <b>HR+/HER2-</b> |          |       |      |                         |        |
|                          |                  | White    | 11534 | 3370 | 136.8 (132.11, 145.91)  | <0.001 |
|                          |                  | Black    | 1816  | 579  | 122.68 (110.39, 145.02) |        |
|                          |                  | API      | 346   | 64   | NR                      |        |
|                          |                  | Hispanic | 549   | 107  | 148.14 (148.14, -)      |        |
|                          |                  | Other    | 213   | 45   | NR                      |        |
|                          | <b>HR+/HER2+</b> |          |       |      |                         |        |
|                          |                  | White    | 1527  | 498  | 122.05 (114.50, -)      | 0.413  |
|                          |                  | Black    | 313   | 105  | 109.77 (85.09, -)       |        |
|                          |                  | API      | 41    | <10  | NR                      |        |
|                          |                  | Hispanic | 67    | 18   | NR                      |        |
|                          |                  | Other    | 20    | <10  | NR                      |        |
|                          | <b>HR-/HER2+</b> |          |       |      |                         |        |
|                          |                  | White    | 147   | 43   | NR                      | 0.123  |
|                          |                  | Black    | 36    | 14   | NR                      |        |
|                          |                  | API      | 10    | <10  | NR                      |        |
|                          |                  | Hispanic | <10   | <10  | NR                      |        |
|                          |                  | Other    | <10   | <10  | NR                      |        |
|                          | <b>TNBC</b>      |          |       |      |                         |        |
|                          |                  | White    | 488   | 182  | NR                      | 0.035  |
|                          |                  | Black    | 148   | 65   | 63.7 (43.66, -)         |        |
|                          |                  | API      | 18    | 11   | 43.7 (24.57, -)         |        |
|                          |                  | Hispanic | 39    | <10  | NR                      |        |
|                          |                  | Other    | 14    | <10  | NR                      |        |

Abbreviations: API, Asian or Pacific Islander; HR, hormone receptor; HER2, human epidermal growth factor receptor 2; TNBC, triple-negative breast cancer; CI, confidence interval, NR, not reached.

<sup>a</sup> *P* values were calculated using the stratified log-rank test.

**Supplementary Table 2.** Estimated 3-Year, 5-Year, and 10-Year Overall Survival Rates for Male Breast Cancer, Overall and Stratified by Tumor Stage and Molecular Subtype

|                    |                  | <b>Race/Ethnicity</b> | <b>3-Year survival,<br/>% (95% CI)</b> | <b>5-Year survival,<br/>% (95% CI)</b> | <b>10-Year survival,<br/>% (95% CI)</b> |
|--------------------|------------------|-----------------------|----------------------------------------|----------------------------------------|-----------------------------------------|
| <b>Overall</b>     |                  |                       |                                        |                                        |                                         |
|                    |                  | White                 | 83.4 (82.7, 84.0)                      | 73.4 (72.6, 74.2)                      | 53.6 (52.3, 54.8)                       |
|                    |                  | Black                 | 79.1 (77.3, 80.7)                      | 68.4 (66.3, 70.3)                      | 48.7 (45.5, 51.8)                       |
|                    |                  | API                   | 88.5 (84.9, 91.2)                      | 81.1 (76.5, 84.9)                      | 62.3 (52.9, 70.3)                       |
|                    |                  | Hispanic              | 87.5 (84.7, 89.8)                      | 79.0 (75.3, 82.2)                      | 67.4 (62.4, 71.9)                       |
|                    |                  | Other                 | 85.7 (80.7, 89.6)                      | 79.0 (72.8, 83.9)                      | 67.3 (58.5, 74.7)                       |
| <b>Tumor stage</b> |                  |                       |                                        |                                        |                                         |
|                    | <b>Stage I</b>   | White                 | 90.2 (89.4, 90.9)                      | 83.3 (82.2, 84.3)                      | 64.9 (62.9, 66.9)                       |
|                    |                  | Black                 | 90.9 (88.7, 92.7)                      | 83.7 (80.6, 86.4)                      | 64.8 (58.9, 70.1)                       |
|                    |                  | API                   | 96.3 (92.3, 98.2)                      | 92.1 (86.1, 95.5)                      | 75.1 (58.1, 86.0)                       |
|                    |                  | Hispanic              | 94.3 (90.7, 96.6)                      | 89.5 (84.3, 93.0)                      | 76.1 (67.5, 82.7)                       |
|                    |                  | Other                 | 94.0 (87.2, 97.3)                      | 87.2 (76.9, 93.1)                      | 74.1 (56.4, 85.5)                       |
|                    |                  |                       |                                        |                                        |                                         |
|                    | <b>Stage II</b>  | White                 | 85.2 (84.2, 96.2)                      | 74.9 (73.6, 76.2)                      | 53.9 (51.9, 55.9)                       |
|                    |                  | Black                 | 83.7 (81.0, 86.1)                      | 73.7 (70.4, 76.6)                      | 52.8 (47.8, 57.6)                       |
|                    |                  | API                   | 90.4 (84.1, 94.3)                      | 82.7 (74.5, 88.5)                      | 57.5 (39.2, 72.1)                       |
|                    |                  | Hispanic              | 88.9 (83.9, 92.3)                      | 81.3 (75.2, 86.0)                      | 74.5 (66.9, 80.6)                       |
|                    |                  | Other                 | 89.5 (81.3, 94.2)                      | 84.4 (74.9, 90.5)                      | 73.0 (60.4, 82.2)                       |
|                    |                  |                       |                                        |                                        |                                         |
|                    | <b>Stage III</b> | White                 | 79.2 (77.2, 81.0)                      | 64.9 (62.5, 67.2)                      | 43.0 (39.8, 46.2)                       |
|                    |                  | Black                 | 71.4 (66.6, 75.6)                      | 56.8 (51.5, 61.8)                      | 36.5 (29.2, 43.9)                       |
|                    |                  | API                   | 84.2 (70.8, 91.8)                      | 73.7 (57.8, 84.3)                      | 61.8 (43.1, 75.9)                       |
|                    |                  | Hispanic              | 85.8 (77.1, 91.3)                      | 72.2 (61.1, 80.6)                      | 52.4 (38.8, 64.4)                       |
|                    |                  | Other                 | 77.7 (56.5, 89.4)                      | 63.9 (41.4, 79.6)                      | 50.3 (26.6, 70.0)                       |
|                    |                  |                       |                                        |                                        |                                         |
|                    | <b>Stage IV</b>  | White                 | 42.9 (39.9, 45.9)                      | 27.0 (24.1, 29.9)                      | 10.7 (7.7, 14.3)                        |
|                    |                  | Black                 | 41.7 (35.8, 47.5)                      | 26.4 (20.8, 32.3)                      | 10.1 (4.8, 17.8)                        |

|                          |                  |          |                   |                   |                   |
|--------------------------|------------------|----------|-------------------|-------------------|-------------------|
|                          |                  | API      | 46.2 (28.8, 61.9) | 29.9 (14.5, 47.1) | 18.7 (5.9, 37.0)  |
|                          |                  | Hispanic | 53.7 (39.8, 65.7) | 33.7 (19.7, 48.3) | 20.2 (6.7, 38.8)  |
|                          |                  | Other    | 50.8 (30.6, 67.8) | 45.7 (25.7, 63.6) | —                 |
| <b>Molecular subtype</b> |                  |          |                   |                   |                   |
|                          | <b>HR+/HER2-</b> | White    | 85.3 (84.6, 85.9) | 75.0 (74.1, 75.9) | 54.3 (52.9, 55.7) |
|                          |                  | Black    | 81.0 (79.1, 82.9) | 70.1 (67.6, 72.4) | 51.2 (47.5, 54.9) |
|                          |                  | API      | 90.8 (87.1, 93.6) | 82.7 (77.5, 86.8) | 62.1 (51.0, 71.4) |
|                          |                  | Hispanic | 89.1 (86.0, 91.6) | 81.3 (77.1, 84.8) | 69.3 (63.4, 74.4) |
|                          |                  | Other    | 87.1 (81.5, 91.1) | 82.8 (76.3, 87.7) | 69.9 (59.5, 78.2) |
|                          |                  |          |                   |                   |                   |
|                          | <b>HR+/HER2+</b> | White    | 81.3 (79.2, 83.2) | 70.8 (68.2, 73.2) | 51.0 (46.8, 55.2) |
|                          |                  | Black    | 80.3 (75.3, 84.5) | 71.2 (65.2, 76.3) | 44.0 (34.1, 53.4) |
|                          |                  | API      | 86.4 (70.3, 94.1) | 86.4 (70.3, 94.1) | 69.9 (41.3, 86.5) |
|                          |                  | Hispanic | 84.8 (72.7, 91.8) | 73.0 (58.2, 83.3) | 58.9 (40.7, 73.2) |
|                          |                  | Other    | 77.4 (49.8, 91.0) | 61.0 (31.4, 80.9) | 50.8 (21.6, 74.1) |
|                          |                  |          |                   |                   |                   |
|                          | <b>HR-/HER2+</b> | White    | 76.3 (68.2, 82.5) | 72.5 (64.0, 79.4) | 62.7 (51.7, 71.9) |
|                          |                  | Black    | 68.4 (48.9, 81.8) | 57.4 (37.7, 72.9) | 53.6 (34.1, 69.7) |
|                          |                  | API      | —                 | —                 | —                 |
|                          |                  | Hispanic | —                 | 83.3 (27.3, 97.5) | —                 |
|                          |                  | Other    | —                 | —                 | —                 |
|                          |                  |          |                   |                   |                   |
|                          | <b>TNBC</b>      | White    | 67.7 (63.2, 71.8) | 62.0 (57.2, 66.5) | 56.4 (50.9, 61.5) |
|                          |                  | Black    | 64.0 (55.3, 71.5) | 52.3 (43.0, 60.8) | 47.3 (37.7, 56.3) |
|                          |                  | API      | 54.6 (29.2, 74.2) | 28.3 (6.5, 55.7)  | 28.3 (6.5, 55.7)  |
|                          |                  | Hispanic | 86.8 (71.2, 94.3) | 76.4 (57.9, 87.6) | 76.4 (57.9, 87.6) |
|                          |                  | Other    | 83.3 (48.2, 95.6) | 60.8 (25.0, 83.6) | —                 |

Abbreviations: API, Asian or Pacific Islander; HR, hormone receptor; HER2, human epidermal growth factor receptor 2; TNBC, triple-negative breast cancer; CI, confidence interval.

**Supplementary Table 3.** Racial/Ethnic Differences in Overall Survival of Male Patients with Breast Cancer: Cox Proportional Hazards Regression

|                                                | <b>Model 1</b>      |                | <b>Model 2</b>      |                | <b>Model 3</b>      |                |
|------------------------------------------------|---------------------|----------------|---------------------|----------------|---------------------|----------------|
|                                                | <b>AHR (95% CI)</b> | <b>P value</b> | <b>AHR (95% CI)</b> | <b>P value</b> | <b>AHR (95% CI)</b> | <b>P value</b> |
| <b>Age at diagnosis</b> (per 10-year increase) | 1.62 (1.59, 1.67)   | <0.001         | 1.71 (1.67, 1.76)   | <0.001         | 1.74 (1.67, 1.80)   | <0.001         |
| <b>Race/Ethnicity</b>                          |                     |                |                     |                |                     |                |
| White                                          | 1.0 (reference)     |                | 1.0 (reference)     |                | 1.0 (reference)     |                |
| Black                                          | 1.44 (1.34, 1.55)   | <0.001         | 1.22 (1.12, 1.32)   | <0.001         | 1.09 (0.99, 1.21)   | 0.075          |
| API                                            | 0.77 (0.62, 0.95)   | 0.013          | 0.69 (0.54, 0.88)   | 0.003          | 0.70 (0.54, 0.90)   | 0.006          |
| Hispanic                                       | 0.94 (0.80, 1.10)   | 0.430          | 0.88 (0.74, 1.06)   | 0.183          | 0.76 (0.62, 0.94)   | 0.010          |
| Other                                          | 0.83 (0.65, 1.06)   | 0.136          | 0.85 (0.65, 1.11)   | 0.234          | 0.86 (0.65, 1.15)   | 0.313          |
| <b>Histologic type</b>                         |                     |                |                     |                |                     |                |
| Ductal                                         |                     |                | 1.0 (reference)     |                | 1.0 (reference)     |                |
| Lobular                                        |                     |                | 0.95 (0.78, 1.15)   | 0.595          | 0.94 (0.76, 1.15)   | 0.527          |
| Ductal and lobular                             |                     |                | 0.88 (0.71, 1.08)   | 0.225          | 0.94 (0.75, 1.19)   | 0.629          |
| Other                                          |                     |                | 1.03 (0.92, 1.15)   | 0.568          | 1.01 (0.89, 1.14)   | 0.910          |
| <b>AJCC stage group</b>                        |                     |                |                     |                |                     |                |
| I                                              |                     |                | 1.0 (reference)     |                | 1.0 (reference)     |                |
| II                                             |                     |                | 1.48 (1.38, 1.60)   | <0.001         | 1.46 (1.35, 1.58)   | <0.001         |
| III                                            |                     |                | 2.12 (1.95, 2.32)   | <0.001         | 2.07 (1.88, 2.28)   | <0.001         |
| IV                                             |                     |                | 7.69 (6.99, 8.45)   | <0.001         | 7.65 (6.89, 8.50)   | <0.001         |
| <b>Molecular subtype</b>                       |                     |                |                     |                |                     |                |
| HR+/HER2-                                      |                     |                | 0.55 (0.48, 0.64)   | <0.001         | 0.56 (0.48, 0.66)   | <0.001         |
| HR+/HER2+                                      |                     |                | 0.62 (0.53, 0.72)   | <0.001         | 0.62 (0.52, 0.74)   | <0.001         |
| HR-/HER2+                                      |                     |                | 0.52 (0.38, 0.72)   | <0.001         | 0.52 (0.36, 0.75)   | 0.001          |
| TNBC                                           |                     |                | 1.0 (reference)     |                | 1.0 (reference)     |                |
| <b>Tumor grade</b>                             |                     |                |                     |                |                     |                |
| 1                                              |                     |                | 1.0 (reference)     |                | 1.0 (reference)     |                |
| 2                                              |                     |                | 1.12 (1.02, 1.23)   | 0.027          | 1.10 (0.99, 1.23)   | 0.079          |
| 3                                              |                     |                | 1.37 (1.24, 1.52)   | <0.001         | 1.32 (1.18, 1.48)   | <0.001         |
| <b>Charlson-Deyo comorbidity score</b>         |                     |                |                     |                |                     |                |



|                                                            |  |  |                   |        |                   |        |
|------------------------------------------------------------|--|--|-------------------|--------|-------------------|--------|
| 0                                                          |  |  | 1.0 (reference)   |        | 1.0 (reference)   |        |
| 1                                                          |  |  | 1.29 (1.20, 1.39) | <0.001 | 1.29 (1.20, 1.40) | <0.001 |
| ≥2                                                         |  |  | 2.03 (1.86, 2.22) | <0.001 | 2.04 (1.85, 2.24) | <0.001 |
| <b>Percent no high school degree quartiles<sup>a</sup></b> |  |  |                   |        |                   |        |
| ≥17.6%                                                     |  |  |                   |        | 1.07 (0.74, 1.22) | 0.277  |
| 10.9-17.5%                                                 |  |  |                   |        | 1.09 (0.98, 1.21) | 0.118  |
| 6.3-10.8%                                                  |  |  |                   |        | 1.15 (1.05, 1.26) | 0.003  |
| <6.3%                                                      |  |  |                   |        | 1.0 (reference)   |        |
| <b>Median household income quartiles<sup>b</sup></b>       |  |  |                   |        |                   |        |
| <\$40,227                                                  |  |  |                   |        | 1.0 (reference)   |        |
| \$40,227–\$50,353                                          |  |  |                   |        | 0.89 (0.80, 0.99) | 0.038  |
| \$50,354–\$63,332                                          |  |  |                   |        | 0.85 (0.76, 0.96) | 0.006  |
| ≥\$63,333                                                  |  |  |                   |        | 0.76 (0.67, 0.86) | <0.001 |
| <b>Type of health insurance</b>                            |  |  |                   |        |                   |        |
| Uninsured                                                  |  |  |                   |        | 1.79 (1.42, 2.26) | <0.001 |
| Private/managed care                                       |  |  |                   |        | 1.0 (reference)   |        |
| Medicaid                                                   |  |  |                   |        | 1.60 (1.35, 1.89) | <0.001 |
| Medicare                                                   |  |  |                   |        | 1.19 (1.09, 1.30) | <0.001 |
| Other government/unknown                                   |  |  |                   |        | 1.24 (1.02, 1.52) | 0.033  |
| <b>Rural-urban area</b>                                    |  |  |                   |        |                   |        |
| Metro                                                      |  |  |                   |        | 1.0 (reference)   |        |
| Urban                                                      |  |  |                   |        | 1.05 (0.95, 1.16) | 0.337  |
| Rural                                                      |  |  |                   |        | 1.08 (0.82, 1.41) | 0.593  |
| <b>Facility type/cancer program</b>                        |  |  |                   |        |                   |        |
| Community                                                  |  |  |                   |        | 1.0 (reference)   |        |
| Comprehensive community                                    |  |  |                   |        | 1.10 (0.98, 1.24) | 0.106  |
| Academic/research                                          |  |  |                   |        | 1.05 (0.92, 1.19) | 0.486  |
| Integrated network                                         |  |  |                   |        | 1.07 (0.94, 1.22) | 0.302  |

Abbreviations: API, Asian or Pacific Islander; AHR, adjusted hazard ratio; CI, confidence interval; AJCC, American Joint Committee on Cancer; HR, hormone receptor; HER2, human epidermal growth factor receptor 2; TNBC, triple-negative breast cancer.

<sup>a</sup> Defined as education attainment for patient residence areas and measured by matching the zip code of the patient recorded at the time of diagnosis against files derived from the 2016 American Community Survey data.

<sup>b</sup> Based on the 2016 American Community Survey data, spanning years 2012–2016 and adjusted for 2016 inflation.

**Supplementary Table 4.** Cox Proportional Hazards Regression: Racial/Ethnic Differences in Overall Survival of Male Patients with Stage I Breast Cancer

|                                                            | <b>Model 1</b>      |                | <b>Model 2</b>      |                | <b>Model 3</b>      |                |
|------------------------------------------------------------|---------------------|----------------|---------------------|----------------|---------------------|----------------|
|                                                            | <b>AHR (95% CI)</b> | <b>P value</b> | <b>AHR (95% CI)</b> | <b>P value</b> | <b>AHR (95% CI)</b> | <b>P value</b> |
| <b>Age at diagnosis</b> (per 10-year increase)             | 2.30 (2.18, 2.42)   | <0.001         | 2.30 (2.17, 2.44)   | <0.001         | 2.24 (2.09, 2.41)   | <0.001         |
| <b>Race/Ethnicity</b>                                      |                     |                |                     |                |                     |                |
| White                                                      | 1.0 (reference)     |                | 1.0 (reference)     |                | 1.0 (reference)     |                |
| Black                                                      | 1.38 (1.17, 1.62)   | <0.001         | 1.26 (1.05, 1.51)   | 0.011          | 1.12 (0.91, 1.38)   | 0.281          |
| API                                                        | 0.65 (0.41, 1.02)   | 0.064          | 0.64 (0.40, 1.04)   | 0.071          | 0.65 (0.38, 1.11)   | 0.117          |
| Hispanic                                                   | 0.996 (0.72, 1.38)  | 0.985          | 0.77 (0.52, 1.14)   | 0.190          | 0.69 (0.44, 1.08)   | 0.102          |
| Other                                                      | 1.01 (0.61, 1.65)   | 0.979          | 0.97 (0.58, 1.62)   | 0.920          | 1.06 (0.62, 1.81)   | 0.824          |
| <b>Histologic type</b>                                     |                     |                |                     |                |                     |                |
| Ductal                                                     |                     |                | 1.0 (reference)     |                | 1.0 (reference)     |                |
| Lobular                                                    |                     |                | 0.94 (0.66, 1.35)   | 0.746          | 0.91 (0.61, 1.35)   | 0.640          |
| Ductal and lobular                                         |                     |                | 0.62 (0.38, 1.01)   | 0.057          | 0.62 (0.36, 1.05)   | 0.074          |
| Other                                                      |                     |                | 0.89 (0.71, 1.11)   | 0.286          | 0.85 (0.67, 1.09)   | 0.198          |
| <b>Molecular subtype</b>                                   |                     |                |                     |                |                     |                |
| HR+/HER2-                                                  |                     |                | 0.81 (0.59, 1.12)   | 0.202          | 0.97 (0.67, 1.41)   | 0.881          |
| HR+/HER2+                                                  |                     |                | 0.98 (0.68, 1.40)   | 0.908          | 1.10 (0.73, 1.66)   | 0.659          |
| HR-/HER2+                                                  |                     |                | 0.61 (0.24, 1.55)   | 0.300          | 0.45 (0.14, 1.48)   | 0.188          |
| TNBC                                                       |                     |                | 1.0 (reference)     |                | 1.0 (reference)     |                |
| <b>Tumor grade</b>                                         |                     |                |                     |                |                     |                |
| 1                                                          |                     |                | 1.0 (reference)     |                | 1.0 (reference)     |                |
| 2                                                          |                     |                | 1.24 (1.07, 1.44)   | 0.004          | 1.25 (1.07, 1.46)   | 0.006          |
| 3                                                          |                     |                | 1.41 (1.18, 1.68)   | <0.001         | 1.42 (1.17, 1.72)   | <0.001         |
| <b>Charlson-Deyo comorbidity score</b>                     |                     |                |                     |                |                     |                |
| 0                                                          |                     |                | 1.0 (reference)     |                | 1.0 (reference)     |                |
| 1                                                          |                     |                | 1.39 (1.21, 1.60)   | <0.001         | 1.41 (1.21, 1.65)   | <0.001         |
| ≥2                                                         |                     |                | 2.15 (1.83, 2.52)   | <0.001         | 2.12 (1.77, 2.53)   | <0.001         |
| <b>Percent no high school degree quartiles<sup>a</sup></b> |                     |                |                     |                |                     |                |
| ≥17.6%                                                     |                     |                |                     |                | 1.19 (0.93, 1.52)   | 0.157          |

|                                                      |  |  |  |  |                   |       |
|------------------------------------------------------|--|--|--|--|-------------------|-------|
| 10.9-17.5%                                           |  |  |  |  | 1.04 (0.85, 1.27) | 0.725 |
| 6.3-10.8%                                            |  |  |  |  | 1.15 (0.98, 1.37) | 0.094 |
| <6.3%                                                |  |  |  |  | 1.0 (reference)   |       |
| <b>Median household income quartiles<sup>b</sup></b> |  |  |  |  |                   |       |
| <\$40,227                                            |  |  |  |  | 1.0 (reference)   |       |
| \$40,227–\$50,353                                    |  |  |  |  | 0.85 (0.68, 1.05) | 0.127 |
| \$50,354–\$63,332                                    |  |  |  |  | 0.89 (0.72, 1.12) | 0.325 |
| ≥\$63,333                                            |  |  |  |  | 0.73 (0.58, 0.93) | 0.012 |
| <b>Type of health insurance</b>                      |  |  |  |  |                   |       |
| Uninsured                                            |  |  |  |  | 1.11 (0.52, 2.37) | 0.782 |
| Private/managed care                                 |  |  |  |  | 1.0 (reference)   |       |
| Medicaid                                             |  |  |  |  | 1.72 (1.16, 2.57) | 0.007 |
| Medicare                                             |  |  |  |  | 1.15 (0.97, 1.37) | 0.111 |
| Other government/unknown                             |  |  |  |  | 1.34 (0.91, 1.99) | 0.138 |
| <b>Rural-urban area</b>                              |  |  |  |  |                   |       |
| Metro                                                |  |  |  |  | 1.0 (reference)   |       |
| Urban                                                |  |  |  |  | 1.22 (1.01, 1.47) | 0.037 |
| Rural                                                |  |  |  |  | 1.27 (0.74, 2.16) | 0.385 |
| <b>Facility type/cancer program</b>                  |  |  |  |  |                   |       |
| Community                                            |  |  |  |  | 1.0 (reference)   |       |
| Comprehensive community                              |  |  |  |  | 1.17 (0.94, 1.45) | 0.152 |
| Academic/research                                    |  |  |  |  | 1.13 (0.90, 1.42) | 0.304 |
| Integrated network                                   |  |  |  |  | 1.11 (0.87, 1.41) | 0.399 |

Abbreviations: API, Asian or Pacific Islander; AHR, adjusted hazard ratio; CI, confidence interval; HR, hormone receptor; HER2, human epidermal growth factor receptor 2; TNBC, triple-negative breast cancer.

<sup>a</sup> Defined as education attainment for patient residence areas and measured by matching the zip code of the patient recorded at the time of diagnosis against files derived from the 2016 American Community Survey data.

<sup>b</sup> Based on the 2016 American Community Survey data, spanning years 2012–2016 and adjusted for 2016 inflation.

**Supplementary Table 5.** Cox Proportional Hazards Regression: Racial/Ethnic Differences in Overall Survival of Male Patients with Stage II Breast Cancer

|                                                            | <b>Model 1</b>      |                | <b>Model 2</b>      |                | <b>Model 3</b>      |                |
|------------------------------------------------------------|---------------------|----------------|---------------------|----------------|---------------------|----------------|
|                                                            | <b>AHR (95% CI)</b> | <b>P value</b> | <b>AHR (95% CI)</b> | <b>P value</b> | <b>AHR (95% CI)</b> | <b>P value</b> |
| <b>Age at diagnosis</b> (per 10-year increase)             | 1.79 (1.72, 1.86)   | <0.001         | 1.75 (1.68, 1.83)   | <0.001         | 1.75 (1.65, 1.86)   | <0.001         |
| <b>Race/Ethnicity</b>                                      |                     |                |                     |                |                     |                |
| White                                                      | 1.0 (reference)     |                | 1.0 (reference)     |                | 1.0 (reference)     |                |
| Black                                                      | 1.28 (1.13, 1.45)   | <0.001         | 1.15 (1.004, 1.33)  | 0.044          | 1.03 (0.87, 1.21)   | 0.758          |
| API                                                        | 0.79 (0.55, 1.13)   | 0.196          | 0.73 (0.50, 1.08)   | 0.120          | 0.77 (0.51, 1.17)   | 0.227          |
| Hispanic                                                   | 0.84 (0.63, 1.11)   | 0.223          | 0.77 (0.56, 1.06)   | 0.113          | 0.70 (0.50, 0.99)   | 0.042          |
| Other                                                      | 0.63 (0.42, 0.97)   | 0.034          | 0.71 (0.46, 1.09)   | 0.113          | 0.70 (0.45, 1.11)   | 0.130          |
| <b>Histologic type</b>                                     |                     |                |                     |                |                     |                |
| Ductal                                                     |                     |                | 1.0 (reference)     |                | 1.0 (reference)     |                |
| Lobular                                                    |                     |                | 0.93 (0.66, 1.30)   | 0.670          | 0.93 (0.65, 1.34)   | 0.712          |
| Ductal and lobular                                         |                     |                | 0.87 (0.61, 1.24)   | 0.438          | 0.89 (0.60, 1.32)   | 0.566          |
| Other                                                      |                     |                | 0.96 (0.78, 1.18)   | 0.698          | 1.03 (0.83, 1.28)   | 0.761          |
| <b>Molecular subtype</b>                                   |                     |                |                     |                |                     |                |
| HR+/HER2-                                                  |                     |                | 0.56 (0.44, 0.71)   | <0.001         | 0.52 (0.41, 0.67)   | <0.001         |
| HR+/HER2+                                                  |                     |                | 0.62 (0.48, 0.81)   | <0.001         | 0.56 (0.43, 0.75)   | <0.001         |
| HR-/HER2+                                                  |                     |                | 0.48 (0.25, 0.94)   | 0.031          | 0.29 (0.12, 0.73)   | 0.008          |
| TNBC                                                       |                     |                | 1.0 (reference)     |                | 1.0 (reference)     |                |
| <b>Tumor grade</b>                                         |                     |                |                     |                |                     |                |
| 1                                                          |                     |                | 1.0 (reference)     |                | 1.0 (reference)     |                |
| 2                                                          |                     |                | 1.01 (0.85, 1.19)   | 0.912          | 1.02 (0.85, 1.22)   | 0.864          |
| 3                                                          |                     |                | 1.21 (1.02, 1.44)   | 0.028          | 1.18 (0.98, 1.42)   | 0.089          |
| <b>Charlson-Deyo comorbidity score</b>                     |                     |                |                     |                |                     |                |
| 0                                                          |                     |                | 1.0 (reference)     |                | 1.0 (reference)     |                |
| 1                                                          |                     |                | 1.26 (1.12, 1.42)   | <0.001         | 1.21 (1.06, 1.37)   | 0.004          |
| ≥2                                                         |                     |                | 2.28 (1.98, 2.62)   | <0.001         | 2.19 (1.88, 2.56)   | <0.001         |
| <b>Percent no high school degree quartiles<sup>a</sup></b> |                     |                |                     |                |                     |                |
| ≥17.6%                                                     |                     |                |                     |                | 0.999 (0.81, 1.23)  | 0.995          |

|                                                      |  |  |  |  |                   |       |
|------------------------------------------------------|--|--|--|--|-------------------|-------|
| 10.9-17.5%                                           |  |  |  |  | 1.08 (0.92, 1.28) | 0.353 |
| 6.3-10.8%                                            |  |  |  |  | 1.04 (0.90, 1.20) | 0.599 |
| <6.3%                                                |  |  |  |  | 1.0 (reference)   |       |
| <b>Median household income quartiles<sup>b</sup></b> |  |  |  |  |                   |       |
| <\$40,227                                            |  |  |  |  | 1.0 (reference)   |       |
| \$40,227–\$50,353                                    |  |  |  |  | 0.87 (0.73, 1.04) | 0.126 |
| \$50,354–\$63,332                                    |  |  |  |  | 0.87 (0.73, 1.05) | 0.140 |
| ≥\$63,333                                            |  |  |  |  | 0.72 (0.59, 0.88) | 0.001 |
| <b>Type of health insurance</b>                      |  |  |  |  |                   |       |
| Uninsured                                            |  |  |  |  | 1.97 (1.34, 2.91) | 0.001 |
| Private/managed care                                 |  |  |  |  | 1.0 (reference)   |       |
| Medicaid                                             |  |  |  |  | 1.28 (0.92, 1.78) | 0.136 |
| Medicare                                             |  |  |  |  | 1.18 (1.02, 1.36) | 0.028 |
| Other government/unknown                             |  |  |  |  | 1.54 (1.14, 2.08) | 0.005 |
| <b>Rural-urban area</b>                              |  |  |  |  |                   |       |
| Metro                                                |  |  |  |  | 1.0 (reference)   |       |
| Urban                                                |  |  |  |  | 0.91 (0.77, 1.08) | 0.273 |
| Rural                                                |  |  |  |  | 0.91 (0.54, 1.53) | 0.723 |
| <b>Facility type/cancer program</b>                  |  |  |  |  |                   |       |
| Community                                            |  |  |  |  | 1.0 (reference)   |       |
| Comprehensive community                              |  |  |  |  | 1.09 (0.88, 1.34) | 0.439 |
| Academic/research                                    |  |  |  |  | 1.04 (0.83, 1.29) | 0.758 |
| Integrated network                                   |  |  |  |  | 1.07 (0.85, 1.34) | 0.558 |

Abbreviations: API, Asian or Pacific Islander; AHR, adjusted hazard ratio; CI, confidence interval; HR, hormone receptor; HER2, human epidermal growth factor receptor 2; TNBC, triple-negative breast cancer.

<sup>a</sup> Defined as education attainment for patient residence areas and measured by matching the zip code of the patient recorded at the time of diagnosis against files derived from the 2016 American Community Survey data.

<sup>b</sup> Based on the 2016 American Community Survey data, spanning years 2012–2016 and adjusted for 2016 inflation.

**Supplementary Table 6.** Cox Proportional Hazards Regression: Racial/Ethnic Differences in Overall Survival of Male Patients with Stage III Breast Cancer

|                                                            | <b>Model 1</b>      |                | <b>Model 2</b>      |                | <b>Model 3</b>      |                |
|------------------------------------------------------------|---------------------|----------------|---------------------|----------------|---------------------|----------------|
|                                                            | <b>AHR (95% CI)</b> | <b>P value</b> | <b>AHR (95% CI)</b> | <b>P value</b> | <b>AHR (95% CI)</b> | <b>P value</b> |
| <b>Age at diagnosis</b> (per 10-year increase)             | 1.52 (1.44, 1.60)   | <0.001         | 1.54 (1.45, 1.64)   | <0.001         | 1.55 (1.42, 1.68)   | <0.001         |
| <b>Race/Ethnicity</b>                                      |                     |                |                     |                |                     |                |
| White                                                      | 1.0 (reference)     |                | 1.0 (reference)     |                | 1.0 (reference)     |                |
| Black                                                      | 1.39 (1.19, 1.63)   | <0.001         | 1.33 (1.12, 1.58)   | 0.001          | 1.18 (0.95, 1.46)   | 0.132          |
| API                                                        | 0.71 (0.42, 1.18)   | 0.182          | 0.65 (0.37, 1.16)   | 0.145          | 0.59 (0.30, 1.15)   | 0.122          |
| Hispanic                                                   | 0.91 (0.65, 1.29)   | 0.599          | 0.89 (0.61, 1.28)   | 0.516          | 0.80 (0.53, 1.21)   | 0.297          |
| Other                                                      | 1.02 (0.56, 1.85)   | 0.949          | 1.26 (0.67, 2.35)   | 0.472          | 1.09 (0.54, 2.22)   | 0.808          |
| <b>Histologic type</b>                                     |                     |                |                     |                |                     |                |
| Ductal                                                     |                     |                | 1.0 (reference)     |                | 1.0 (reference)     |                |
| Lobular                                                    |                     |                | 1.49 (0.98, 2.24)   | 0.060          | 1.55 (0.98, 2.45)   | 0.063          |
| Ductal and lobular                                         |                     |                | 1.07 (0.70, 1.66)   | 0.748          | 1.16 (0.73, 1.84)   | 0.526          |
| Other                                                      |                     |                | 1.14 (0.90, 1.43)   | 0.271          | 1.04 (0.80, 1.34)   | 0.786          |
| <b>Molecular subtype</b>                                   |                     |                |                     |                |                     |                |
| HR+/HER2-                                                  |                     |                | 0.82 (0.58, 1.16)   | 0.262          | 0.87 (0.58, 1.31)   | 0.510          |
| HR+/HER2+                                                  |                     |                | 0.87 (0.59, 1.28)   | 0.473          | 0.90 (0.58, 1.42)   | 0.660          |
| HR-/HER2+                                                  |                     |                | 0.70 (0.37, 1.33)   | 0.278          | 0.90 (0.45, 1.79)   | 0.757          |
| TNBC                                                       |                     |                | 1.0 (reference)     |                | 1.0 (reference)     |                |
| <b>Tumor grade</b>                                         |                     |                |                     |                |                     |                |
| 1                                                          |                     |                | 1.0 (reference)     |                | 1.0 (reference)     |                |
| 2                                                          |                     |                | 1.08 (0.80, 1.45)   | 0.628          | 1.05 (0.76, 1.46)   | 0.752          |
| 3                                                          |                     |                | 1.50 (1.11, 2.02)   | 0.008          | 1.50 (1.08, 2.09)   | 0.015          |
| <b>Charlson-Deyo comorbidity score</b>                     |                     |                |                     |                |                     |                |
| 0                                                          |                     |                | 1.0 (reference)     |                | 1.0 (reference)     |                |
| 1                                                          |                     |                | 1.25 (1.07, 1.48)   | 0.006          | 1.40 (1.17, 1.67)   | <0.001         |
| ≥2                                                         |                     |                | 1.93 (1.58, 2.35)   | <0.001         | 2.03 (1.63, 2.54)   | <0.001         |
| <b>Percent no high school degree quartiles<sup>a</sup></b> |                     |                |                     |                |                     |                |
| ≥17.6%                                                     |                     |                |                     |                | 1.09 (0.80, 1.47)   | 0.592          |

|                                                      |  |  |  |  |                    |       |
|------------------------------------------------------|--|--|--|--|--------------------|-------|
| 10.9-17.5%                                           |  |  |  |  | 1.18 (0.92, 1.53)  | 0.198 |
| 6.3-10.8%                                            |  |  |  |  | 1.39 (1.12, 1.74)  | 0.003 |
| <6.3%                                                |  |  |  |  | 1.0 (reference)    |       |
| <b>Median household income quartiles<sup>b</sup></b> |  |  |  |  |                    |       |
| <\$40,227                                            |  |  |  |  | 1.0 (reference)    |       |
| \$40,227–\$50,353                                    |  |  |  |  | 0.96 (0.76, 1.22)  | 0.754 |
| \$50,354–\$63,332                                    |  |  |  |  | 0.77 (0.59, 1.003) | 0.053 |
| ≥\$63,333                                            |  |  |  |  | 0.80 (1.12, 1.74)  | 0.129 |
| <b>Type of health insurance</b>                      |  |  |  |  |                    |       |
| Uninsured                                            |  |  |  |  | 1.12 (0.67, 1.87)  | 0.655 |
| Private/managed care                                 |  |  |  |  | 1.0 (reference)    |       |
| Medicaid                                             |  |  |  |  | 1.52 (1.08, 2.15)  | 0.016 |
| Medicare                                             |  |  |  |  | 1.13 (0.92, 1.40)  | 0.253 |
| Other government/unknown                             |  |  |  |  | 1.17 (0.76, 1.81)  | 0.469 |
| <b>Rural-urban area</b>                              |  |  |  |  |                    |       |
| Metro                                                |  |  |  |  | 1.0 (reference)    |       |
| Urban                                                |  |  |  |  | 1.13 (0.91, 1.42)  | 0.274 |
| Rural                                                |  |  |  |  | 0.91 (0.49, 1.69)  | 0.771 |
| <b>Facility type/cancer program</b>                  |  |  |  |  |                    |       |
| Community                                            |  |  |  |  | 1.0 (reference)    |       |
| Comprehensive community                              |  |  |  |  | 0.99 (0.76, 1.29)  | 0.967 |
| Academic/research                                    |  |  |  |  | 0.91 (0.68, 1.20)  | 0.495 |
| Integrated network                                   |  |  |  |  | 1.07 (0.80, 1.44)  | 0.634 |

Abbreviations: API, Asian or Pacific Islander; AHR, adjusted hazard ratio; CI, confidence interval; HR, hormone receptor; HER2, human epidermal growth factor receptor 2; TNBC, triple-negative breast cancer.

<sup>a</sup> Defined as education attainment for patient residence areas and measured by matching the zip code of the patient recorded at the time of diagnosis against files derived from the 2016 American Community Survey data.

<sup>b</sup> Based on the 2016 American Community Survey data, spanning years 2012–2016 and adjusted for 2016 inflation.



**Supplementary Table 7.** Cox Proportional Hazards Regression: Racial/Ethnic Differences in Overall Survival of Male Patients with Stage IV Breast Cancer

|                                                            | <b>Model 1</b>      |                | <b>Model 2</b>      |                | <b>Model 3</b>      |                |
|------------------------------------------------------------|---------------------|----------------|---------------------|----------------|---------------------|----------------|
|                                                            | <b>AHR (95% CI)</b> | <b>P value</b> | <b>AHR (95% CI)</b> | <b>P value</b> | <b>AHR (95% CI)</b> | <b>P value</b> |
| <b>Age at diagnosis</b> (per 10-year increase)             | 1.19 (1.13, 1.25)   | <0.001         | 1.20 (1.12, 1.28)   | <0.001         | 1.24 (1.13, 1.36)   | <0.001         |
| <b>Race/Ethnicity</b>                                      |                     |                |                     |                |                     |                |
| White                                                      | 1.0 (reference)     |                | 1.0 (reference)     |                | 1.0 (reference)     |                |
| Black                                                      | 1.10 (0.95, 1.29)   | 0.201          | 1.12 (0.93, 1.36)   | 0.233          | 1.16 (0.92, 1.47)   | 0.200          |
| API                                                        | 0.81 (0.54, 1.20)   | 0.290          | 0.79 (0.45, 1.37)   | 0.399          | 0.85 (0.48, 1.49)   | 0.565          |
| Hispanic                                                   | 0.87 (0.62, 1.22)   | 0.411          | 1.18 (0.79, 1.76)   | 0.411          | 1.15 (0.70, 1.88)   | 0.591          |
| Other                                                      | 0.61 (0.36, 1.03)   | 0.066          | 0.76 (0.36, 1.61)   | 0.477          | 0.88 (0.39, 2.02)   | 0.771          |
| <b>Histologic type</b>                                     |                     |                |                     |                |                     |                |
| Ductal                                                     |                     |                | 1.0 (reference)     |                | 1.0 (reference)     |                |
| Lobular                                                    |                     |                | 0.70 (0.42, 1.15)   | 0.160          | 0.65 (0.38, 1.10)   | 0.110          |
| Ductal and lobular                                         |                     |                | 1.32 (0.82, 2.12)   | 0.261          | 1.82 (1.03, 3.23)   | 0.040          |
| Other                                                      |                     |                | 1.07 (0.83, 1.38)   | 0.609          | 1.04 (0.78, 1.38)   | 0.785          |
| <b>Molecular subtype</b>                                   |                     |                |                     |                |                     |                |
| HR+/HER2-                                                  |                     |                | 0.23 (0.17, 0.30)   | <0.001         | 0.23 (0.17, 0.31)   | <0.001         |
| HR+/HER2+                                                  |                     |                | 0.23 (0.17, 0.32)   | <0.001         | 0.23 (0.16, 0.33)   | <0.001         |
| HR-/HER2+                                                  |                     |                | 0.30 (0.17, 0.52)   | <0.001         | 0.33 (0.18, 0.63)   | 0.001          |
| TNBC                                                       |                     |                | 1.0 (reference)     |                | 1.0 (reference)     |                |
| <b>Tumor grade</b>                                         |                     |                |                     |                |                     |                |
| 1                                                          |                     |                | 1.0 (reference)     |                | 1.0 (reference)     |                |
| 2                                                          |                     |                | 1.05 (0.74, 1.48)   | 0.791          | 0.84 (0.57, 1.24)   | 0.375          |
| 3                                                          |                     |                | 1.28 (0.91, 1.82)   | 0.160          | 1.04 (0.70, 1.53)   | 0.848          |
| <b>Charlson-Deyo comorbidity score</b>                     |                     |                |                     |                |                     |                |
| 0                                                          |                     |                | 1.0 (reference)     |                | 1.0 (reference)     |                |
| 1                                                          |                     |                | 1.24 (1.03, 1.51)   | 0.026          | 1.19 (0.96, 1.47)   | 0.118          |
| ≥2                                                         |                     |                | 1.53 (1.20, 1.95)   | 0.001          | 1.52 (1.15, 2.00)   | 0.003          |
| <b>Percent no high school degree quartiles<sup>a</sup></b> |                     |                |                     |                |                     |                |
| ≥17.6%                                                     |                     |                |                     |                | 1.21 (0.86, 1.71)   | 0.272          |

|                                                      |  |  |  |  |                    |       |
|------------------------------------------------------|--|--|--|--|--------------------|-------|
| 10.9-17.5%                                           |  |  |  |  | 1.08 (0.81, 1.44)  | 0.604 |
| 6.3-10.8%                                            |  |  |  |  | 1.12 (0.88, 1.43)  | 0.365 |
| <6.3%                                                |  |  |  |  | 1.0 (reference)    |       |
| <b>Median household income quartiles<sup>b</sup></b> |  |  |  |  |                    |       |
| <\$40,227                                            |  |  |  |  | 1.0 (reference)    |       |
| \$40,227–\$50,353                                    |  |  |  |  | 1.13 (0.84, 1.51)  | 0.417 |
| \$50,354–\$63,332                                    |  |  |  |  | 1.07 (0.79, 1.45)  | 0.659 |
| ≥\$63,333                                            |  |  |  |  | 1.16 (0.82, 1.63)  | 0.406 |
| <b>Type of health insurance</b>                      |  |  |  |  |                    |       |
| Uninsured                                            |  |  |  |  | 1.94 (1.27, 2.96)  | 0.002 |
| Private/managed care                                 |  |  |  |  | 1.0 (reference)    |       |
| Medicaid                                             |  |  |  |  | 1.41 (1.03, 1.92)  | 0.033 |
| Medicare                                             |  |  |  |  | 1.26 (1.004, 1.57) | 0.046 |
| Other government/unknown                             |  |  |  |  | 0.56 (0.27, 1.17)  | 0.123 |
| <b>Rural-urban area</b>                              |  |  |  |  |                    |       |
| Metro                                                |  |  |  |  | 1.0 (reference)    |       |
| Urban                                                |  |  |  |  | 1.09 (0.84, 1.42)  | 0.508 |
| Rural                                                |  |  |  |  | 1.63 (0.96, 2.80)  | 0.072 |
| <b>Facility type/cancer program</b>                  |  |  |  |  |                    |       |
| Community                                            |  |  |  |  | 1.0 (reference)    |       |
| Comprehensive community                              |  |  |  |  | 0.98 (0.73, 1.32)  | 0.889 |
| Academic/research                                    |  |  |  |  | 0.89 (0.65, 1.22)  | 0.474 |
| Integrated network                                   |  |  |  |  | 0.81 (0.58, 1.12)  | 0.199 |

Abbreviations: API, Asian or Pacific Islander; AHR, adjusted hazard ratio; CI, confidence interval; HR, hormone receptor; HER2, human epidermal growth factor receptor 2; TNBC, triple-negative breast cancer.

<sup>a</sup> Defined as education attainment for patient residence areas and measured by matching the zip code of the patient recorded at the time of diagnosis against files derived from the 2016 American Community Survey data.

<sup>b</sup> Based on the 2016 American Community Survey data, spanning years 2012–2016 and adjusted for 2016 inflation.

**Supplementary Table 8.** Cox Proportional Hazards Regression: Racial/Ethnic Differences in Overall Survival of Male Patients with HR-Positive/HER2-Negative Breast Cancer

|                                                            | <b>Model 1</b>      |                | <b>Model 2</b>      |                | <b>Model 3</b>      |                |
|------------------------------------------------------------|---------------------|----------------|---------------------|----------------|---------------------|----------------|
|                                                            | <b>AHR (95% CI)</b> | <b>P value</b> | <b>AHR (95% CI)</b> | <b>P value</b> | <b>AHR (95% CI)</b> | <b>P value</b> |
| <b>Age at diagnosis</b> (per 10-year increase)             | 1.69 (1.64, 1.74)   | <0.001         | 1.74 (1.69, 1.80)   | <0.001         |                     |                |
| <b>Race/Ethnicity</b>                                      |                     |                |                     |                |                     |                |
| White                                                      | 1.0 (reference)     |                | 1.0 (reference)     |                | 1.0 (reference)     |                |
| Black                                                      | 1.46 (1.33, 1.59)   | <0.001         | 1.23 (1.12, 1.35)   | <0.001         | 1.09 (0.98, 1.22)   | 0.111          |
| API                                                        | 0.73 (0.57, 0.94)   | 0.014          | 0.63 (0.48, 0.82)   | 0.001          | 0.65 (0.48, 0.86)   | 0.003          |
| Hispanic                                                   | 0.92 (0.76, 1.12)   | 0.408          | 0.85 (0.70, 1.05)   | 0.135          | 0.76 (0.61, 0.95)   | 0.017          |
| Other                                                      | 0.77 (0.58, 1.04)   | 0.089          | 0.79 (0.58, 1.07)   | 0.131          | 0.84 (0.61, 1.16)   | 0.292          |
| <b>Histologic type</b>                                     |                     |                |                     |                |                     |                |
| Ductal                                                     |                     |                | 1.0 (reference)     |                | 1.0 (reference)     |                |
| Lobular                                                    |                     |                | 1.02 (0.83, 1.25)   | 0.873          | 0.98 (0.79, 1.22)   | 0.868          |
| Ductal and lobular                                         |                     |                | 0.83 (0.66, 1.06)   | 0.131          | 0.91 (0.71, 1.18)   | 0.499          |
| Other                                                      |                     |                | 1.05 (0.93, 1.19)   | 0.427          | 1.03 (0.90, 1.18)   | 0.650          |
| <b>AJCC stage group</b>                                    |                     |                |                     |                |                     |                |
| I                                                          |                     |                | 1.0 (reference)     |                | 1.0 (reference)     |                |
| II                                                         |                     |                | 1.45 (1.34, 1.57)   | <0.001         | 1.42 (1.30, 1.54)   | <0.001         |
| III                                                        |                     |                | 2.11 (1.91, 2.32)   | <0.001         | 2.03 (1.83, 2.26)   | <0.001         |
| IV                                                         |                     |                | 7.16 (6.43, 7.97)   | <0.001         | 7.01 (6.22, 7.90)   | <0.001         |
| <b>Tumor grade</b>                                         |                     |                |                     |                |                     |                |
| 1                                                          |                     |                | 1.0 (reference)     |                | 1.0 (reference)     |                |
| 2                                                          |                     |                | 1.13 (1.02, 1.25)   | 0.021          | 1.12 (1.001, 1.25)  | 0.049          |
| 3                                                          |                     |                | 1.40 (1.26, 1.57)   | <0.001         | 1.36 (1.21, 1.54)   | <0.001         |
| <b>Charlson-Deyo comorbidity score</b>                     |                     |                |                     |                |                     |                |
| 0                                                          |                     |                | 1.0 (reference)     |                | 1.0 (reference)     |                |
| 1                                                          |                     |                | 1.33 (1.23, 1.44)   | <0.001         | 1.35 (1.24, 1.47)   | <0.001         |
| ≥2                                                         |                     |                | 2.12 (1.93, 2.33)   | <0.001         | 2.13 (1.92, 2.37)   | <0.001         |
| <b>Percent no high school degree quartiles<sup>a</sup></b> |                     |                |                     |                |                     |                |
| ≥17.6%                                                     |                     |                |                     |                | 1.06 (0.92, 1.22)   | 0.442          |

|                                                      |  |  |  |  |                    |        |
|------------------------------------------------------|--|--|--|--|--------------------|--------|
| 10.9-17.5%                                           |  |  |  |  | 1.05 (0.94, 1.18)  | 0.401  |
| 6.3-10.8%                                            |  |  |  |  | 1.11 (1.004, 1.22) | 0.041  |
| <6.3%                                                |  |  |  |  | 1.0 (reference)    |        |
| <b>Median household income quartiles<sup>b</sup></b> |  |  |  |  |                    |        |
| <\$40,227                                            |  |  |  |  | 1.0 (reference)    |        |
| \$40,227–\$50,353                                    |  |  |  |  | 0.89 (0.79, 1.01)  | 0.067  |
| \$50,354–\$63,332                                    |  |  |  |  | 0.86 (0.76, 0.98)  | 0.019  |
| ≥\$63,333                                            |  |  |  |  | 0.73 (0.64, 0.84)  | <0.001 |
| <b>Type of health insurance</b>                      |  |  |  |  |                    |        |
| Uninsured                                            |  |  |  |  | 1.68 (1.29, 2.19)  | <0.001 |
| Private/managed care                                 |  |  |  |  | 1.0 (reference)    |        |
| Medicaid                                             |  |  |  |  | 1.73 (1.43, 2.09)  | <0.001 |
| Medicare                                             |  |  |  |  | 1.21 (1.10, 1.33)  | <0.001 |
| Other government/unknown                             |  |  |  |  | 1.23 (0.99, 1.54)  | 0.060  |
| <b>Rural-urban area</b>                              |  |  |  |  |                    |        |
| Metro                                                |  |  |  |  | 1.0 (reference)    |        |
| Urban                                                |  |  |  |  | 1.05 (0.94, 1.17)  | 0.400  |
| Rural                                                |  |  |  |  | 1.04 (0.77, 1.41)  | 0.777  |
| <b>Facility type/cancer program</b>                  |  |  |  |  |                    |        |
| Community                                            |  |  |  |  | 1.0 (reference)    |        |
| Comprehensive community                              |  |  |  |  | 1.12 (0.98, 1.27)  | 0.096  |
| Academic/research                                    |  |  |  |  | 1.05 (0.91, 1.20)  | 0.517  |
| Integrated network                                   |  |  |  |  | 1.08 (0.93, 1.24)  | 0.315  |

Abbreviations: API, Asian or Pacific Islander; AHR, adjusted hazard ratio; CI, confidence interval; AJCC, American Joint Committee on Cancer; HR, hormone receptor; HER2, human epidermal growth factor receptor 2.

<sup>a</sup> Defined as education attainment for patient residence areas and measured by matching the zip code of the patient recorded at the time of diagnosis against files derived from the 2016 American Community Survey data.

<sup>b</sup> Based on the 2016 American Community Survey data, spanning years 2012–2016 and adjusted for 2016 inflation.

**Supplementary Table 9.** Cox Proportional Hazards Regression: Racial/Ethnic Differences in Overall Survival of Male Patients with HER2-Positive Breast Cancer

|                                                            | <b>Model 1</b>      |                | <b>Model 2</b>      |                | <b>Model 3</b>      |                |
|------------------------------------------------------------|---------------------|----------------|---------------------|----------------|---------------------|----------------|
|                                                            | <b>AHR (95% CI)</b> | <b>P value</b> | <b>AHR (95% CI)</b> | <b>P value</b> | <b>AHR (95% CI)</b> | <b>P value</b> |
| <b>Age at diagnosis</b> (per 10-year increase)             | 1.51 (1.42, 1.61)   | <0.001         | 1.64 (1.52, 1.76)   | <0.001         | 1.65 (1.48, 1.83)   | <0.001         |
| <b>Race/Ethnicity</b>                                      |                     |                |                     |                |                     |                |
| White                                                      | 1.0 (reference)     |                | 1.0 (reference)     |                | 1.0 (reference)     |                |
| Black                                                      | 1.28 (1.05, 1.56)   | 0.016          | 1.13 (0.91, 1.41)   | 0.261          | 1.08 (0.82, 1.42)   | 0.579          |
| API                                                        | 0.52 (0.25, 1.10)   | 0.087          | 0.43 (0.16, 1.16)   | 0.097          | 0.53 (0.19, 1.43)   | 0.208          |
| Hispanic                                                   | 1.02 (0.66, 1.60)   | 0.915          | 1.14 (0.72, 1.80)   | 0.583          | 0.79 (0.43, 1.42)   | 0.424          |
| Other                                                      | 1.12 (0.56, 2.25)   | 0.750          | 1.11 (0.52, 2.35)   | 0.790          | 0.97 (0.39, 2.40)   | 0.953          |
| <b>Histologic type</b>                                     |                     |                |                     |                |                     |                |
| Ductal                                                     |                     |                | 1.0 (reference)     |                | 1.0 (reference)     |                |
| Lobular                                                    |                     |                | 0.51 (0.22, 1.16)   | 0.107          | 0.48 (0.19, 1.21)   | 0.119          |
| Ductal and lobular                                         |                     |                | 1.22 (0.71, 2.09)   | 0.471          | 1.29 (0.71, 2.31)   | 0.401          |
| Other                                                      |                     |                | 1.04 (0.74, 1.45)   | 0.829          | 1.04 (0.73, 1.49)   | 0.821          |
| <b>AJCC stage group</b>                                    |                     |                |                     |                |                     |                |
| I                                                          |                     |                | 1.0 (reference)     |                | 1.0 (reference)     |                |
| II                                                         |                     |                | 1.41 (1.13, 1.75)   | 0.002          | 1.40 (1.09, 1.78)   | 0.007          |
| III                                                        |                     |                | 1.998 (1.56, 2.57)  | <0.001         | 2.04 (1.55, 2.69)   | <0.001         |
| IV                                                         |                     |                | 7.01 (5.47, 8.98)   | <0.001         | 7.30 (5.49, 9.70)   | <0.001         |
| <b>Tumor grade</b>                                         |                     |                |                     |                |                     |                |
| 1                                                          |                     |                | 1.0 (reference)     |                | 1.0 (reference)     |                |
| 2                                                          |                     |                | 0.98 (0.66, 1.45)   | 0.914          | 1.03 (0.67, 1.58)   | 0.889          |
| 3                                                          |                     |                | 1.17 (0.79, 1.74)   | 0.422          | 1.22 (0.80, 1.87)   | 0.362          |
| <b>Charlson-Deyo comorbidity score</b>                     |                     |                |                     |                |                     |                |
| 0                                                          |                     |                | 1.0 (reference)     |                | 1.0 (reference)     |                |
| 1                                                          |                     |                | 1.13 (0.92, 1.40)   | 0.249          | 1.08 (0.84, 1.37)   | 0.555          |
| ≥2                                                         |                     |                | 1.88 (1.46, 2.43)   | <0.001         | 2.07 (1.56, 2.73)   | <0.001         |
| <b>Percent no high school degree quartiles<sup>a</sup></b> |                     |                |                     |                |                     |                |
| ≥17.6%                                                     |                     |                |                     |                | 0.998 (0.69, 1.45)  | 0.991          |

|                                                      |  |  |  |  |                    |       |
|------------------------------------------------------|--|--|--|--|--------------------|-------|
| 10.9-17.5%                                           |  |  |  |  | 1.20 (0.87, 1.65)  | 0.269 |
| 6.3-10.8%                                            |  |  |  |  | 1.21 (0.92, 1.59)  | 0.165 |
| <6.3%                                                |  |  |  |  | 1.0 (reference)    |       |
| <b>Median household income quartiles<sup>b</sup></b> |  |  |  |  |                    |       |
| <\$40,227                                            |  |  |  |  | 1.0 (reference)    |       |
| \$40,227–\$50,353                                    |  |  |  |  | 0.82 (0.60, 1.11)  | 0.200 |
| \$50,354–\$63,332                                    |  |  |  |  | 0.89 (0.65, 1.21)  | 0.450 |
| ≥\$63,333                                            |  |  |  |  | 0.89 (0.62, 1.27)  | 0.512 |
| <b>Type of health insurance</b>                      |  |  |  |  |                    |       |
| Uninsured                                            |  |  |  |  | 2.47 (1.28, 4.75)  | 0.007 |
| Private/managed care                                 |  |  |  |  | 1.0 (reference)    |       |
| Medicaid                                             |  |  |  |  | 1.23 (0.78, 1.94)  | 0.376 |
| Medicare                                             |  |  |  |  | 1.29 (0.996, 1.67) | 0.054 |
| Other government/unknown                             |  |  |  |  | 1.13 (0.61, 2.11)  | 0.697 |
| <b>Rural-urban area</b>                              |  |  |  |  |                    |       |
| Metro                                                |  |  |  |  | 1.0 (reference)    |       |
| Urban                                                |  |  |  |  | 1.16 (0.89, 1.52)  | 0.271 |
| Rural                                                |  |  |  |  | 2.23 (1.12, 4.42)  | 0.022 |
| <b>Facility type/cancer program</b>                  |  |  |  |  |                    |       |
| Community                                            |  |  |  |  | 1.0 (reference)    |       |
| Comprehensive community                              |  |  |  |  | 0.95 (0.68, 1.33)  | 0.773 |
| Academic/research                                    |  |  |  |  | 0.92 (0.65, 1.30)  | 0.620 |
| Integrated network                                   |  |  |  |  | 0.96 (0.67, 1.39)  | 0.831 |

Abbreviations: API, Asian or Pacific Islander; AHR, adjusted hazard ratio; CI, confidence interval; AJCC, American Joint Committee on Cancer; HER2, human epidermal growth factor receptor 2.

<sup>a</sup> Defined as education attainment for patient residence areas and measured by matching the zip code of the patient recorded at the time of diagnosis against files derived from the 2016 American Community Survey data.

<sup>b</sup> Based on the 2016 American Community Survey data, spanning years 2012–2016 and adjusted for 2016 inflation.

**Supplementary Table 10.** Cox Proportional Hazards Regression: Racial/Ethnic Differences in Overall Survival of Male Patients with Triple-Negative Breast Cancer

|                                                            | <b>Model 1</b>      |                | <b>Model 2</b>       |                | <b>Model 3</b>       |                |
|------------------------------------------------------------|---------------------|----------------|----------------------|----------------|----------------------|----------------|
|                                                            | <b>AHR (95% CI)</b> | <b>P value</b> | <b>AHR (95% CI)</b>  | <b>P value</b> | <b>AHR (95% CI)</b>  | <b>P value</b> |
| <b>Age at diagnosis</b> (per 10-year increase)             | 1.45 (1.31, 1.59)   | <0.001         | 1.48 (1.32, 1.65)    | <0.001         | 1.82 (1.54, 2.16)    | <0.001         |
| <b>Race/Ethnicity</b>                                      |                     |                |                      |                |                      |                |
| White                                                      | 1.0 (reference)     |                | 1.0 (reference)      |                | 1.0 (reference)      |                |
| Black                                                      | 1.44 (1.08, 1.91)   | 0.014          | 1.23 (0.89, 1.69)    | 0.206          | 1.09 (0.74, 1.61)    | 0.650          |
| API                                                        | 1.85 (1.01, 3.41)   | 0.047          | 2.35 (1.21, 4.55)    | 0.011          | 2.14 (0.92, 4.99)    | 0.078          |
| Hispanic                                                   | 0.65 (0.32, 1.32)   | 0.234          | 0.83 (0.36, 1.90)    | 0.657          | 0.79 (0.31, 2.01)    | 0.623          |
| Other                                                      | 0.92 (0.34, 2.49)   | 0.874          | 1.36 (0.50, 3.71)    | 0.545          | 1.20 (0.37, 3.92)    | 0.764          |
| <b>Histologic type</b>                                     |                     |                |                      |                |                      |                |
| Ductal                                                     |                     |                | 1.0 (reference)      |                | 1.0 (reference)      |                |
| Lobular                                                    |                     |                | 0.53 (0.21, 1.33)    | 0.175          | 0.62 (0.20, 1.89)    | 0.400          |
| Ductal and lobular                                         |                     |                | 1.32 (0.32, 5.49)    | 0.700          | 0.82 (0.11, 6.45)    | 0.853          |
| Other                                                      |                     |                | 0.83 (0.58, 1.19)    | 0.308          | 0.85 (0.57, 1.29)    | 0.448          |
| <b>AJCC stage group</b>                                    |                     |                |                      |                |                      |                |
| I                                                          |                     |                | 1.0 (reference)      |                | 1.0 (reference)      |                |
| II                                                         |                     |                | 2.04 (1.39, 3.00)    | <0.001         | 2.82 (1.79, 4.45)    | <0.001         |
| III                                                        |                     |                | 2.61 (1.64, 4.13)    | <0.001         | 3.10 (1.76, 5.45)    | <0.001         |
| IV                                                         |                     |                | 21.10 (13.58, 32.79) | <0.001         | 26.75 (15.52, 46.11) | <0.001         |
| <b>Tumor grade</b>                                         |                     |                |                      |                |                      |                |
| 1                                                          |                     |                | 1.0 (reference)      |                | 1.0 (reference)      |                |
| 2                                                          |                     |                | 1.72 (0.77, 3.83)    | 0.188          | 0.77 (0.29, 2.04)    | 0.603          |
| 3                                                          |                     |                | 1.71 (0.79, 3.71)    | 0.175          | 0.92 (0.36, 2.34)    | 0.863          |
| <b>Charlson-Deyo comorbidity score</b>                     |                     |                |                      |                |                      |                |
| 0                                                          |                     |                | 1.0 (reference)      |                | 1.0 (reference)      |                |
| 1                                                          |                     |                | 1.20 (0.82, 1.75)    | 0.339          | 1.06 (0.69, 1.62)    | 0.804          |
| ≥2                                                         |                     |                | 1.27 (0.77, 2.09)    | 0.351          | 1.15 (0.65, 2.04)    | 0.635          |
| <b>Percent no high school degree quartiles<sup>a</sup></b> |                     |                |                      |                |                      |                |
| ≥17.6%                                                     |                     |                |                      |                | 1.85 (0.98, 3.49)    | 0.058          |

|                                                      |  |  |  |  |                   |       |
|------------------------------------------------------|--|--|--|--|-------------------|-------|
| 10.9-17.5%                                           |  |  |  |  | 1.55 (0.89, 2.67) | 0.118 |
| 6.3-10.8%                                            |  |  |  |  | 1.64 (0.97, 2.76) | 0.064 |
| <6.3%                                                |  |  |  |  | 1.0 (reference)   |       |
| <b>Median household income quartiles<sup>b</sup></b> |  |  |  |  |                   |       |
| <\$40,227                                            |  |  |  |  | 1.0 (reference)   |       |
| \$40,227–\$50,353                                    |  |  |  |  | 1.13 (0.69, 1.86) | 0.621 |
| \$50,354–\$63,332                                    |  |  |  |  | 0.81 (0.47, 1.38) | 0.434 |
| ≥\$63,333                                            |  |  |  |  | 0.95 (0.53, 1.68) | 0.858 |
| <b>Type of health insurance</b>                      |  |  |  |  |                   |       |
| Uninsured                                            |  |  |  |  | 2.08 (0.94, 4.59) | 0.071 |
| Private/managed care                                 |  |  |  |  | 1.0 (reference)   |       |
| Medicaid                                             |  |  |  |  | 0.97 (0.51, 1.83) | 0.915 |
| Medicare                                             |  |  |  |  | 0.72 (0.47, 1.10) | 0.125 |
| Other government/unknown                             |  |  |  |  | 2.44 (1.10, 5.41) | 0.028 |
| <b>Rural-urban area</b>                              |  |  |  |  |                   |       |
| Metro                                                |  |  |  |  | 1.0 (reference)   |       |
| Urban                                                |  |  |  |  | 0.82 (0.48, 1.38) | 0.447 |
| Rural                                                |  |  |  |  | 0.43 (0.10, 1.83) | 0.250 |
| <b>Facility type/cancer program</b>                  |  |  |  |  |                   |       |
| Community                                            |  |  |  |  | 1.0 (reference)   |       |
| Comprehensive community                              |  |  |  |  | 1.20 (0.68, 2.14) | 0.525 |
| Academic/research                                    |  |  |  |  | 1.22 (0.66, 2.25) | 0.529 |
| Integrated network                                   |  |  |  |  | 0.84 (0.45, 1.58) | 0.592 |

Abbreviations: API, Asian or Pacific Islander; AHR, adjusted hazard ratio; CI, confidence interval; AJCC, American Joint Committee on Cancer.

<sup>a</sup> Defined as education attainment for patient residence areas and measured by matching the zip code of the patient recorded at the time of diagnosis against files derived from the 2016 American Community Survey data.

<sup>b</sup> Based on the 2016 American Community Survey data, spanning years 2012–2016 and adjusted for 2016 inflation.
